# Supplementary material for: Selective Ablation of BCL11A in Epidermal Keratinocytes Alters Skin Homeostasis and Accelerates Excisional Wound Healing In Vivo
Source: MDPI journal article supplement (doi:10.3390/cells11132106), 2022-07-03
Supplement: s1 [file s1]

a

P39

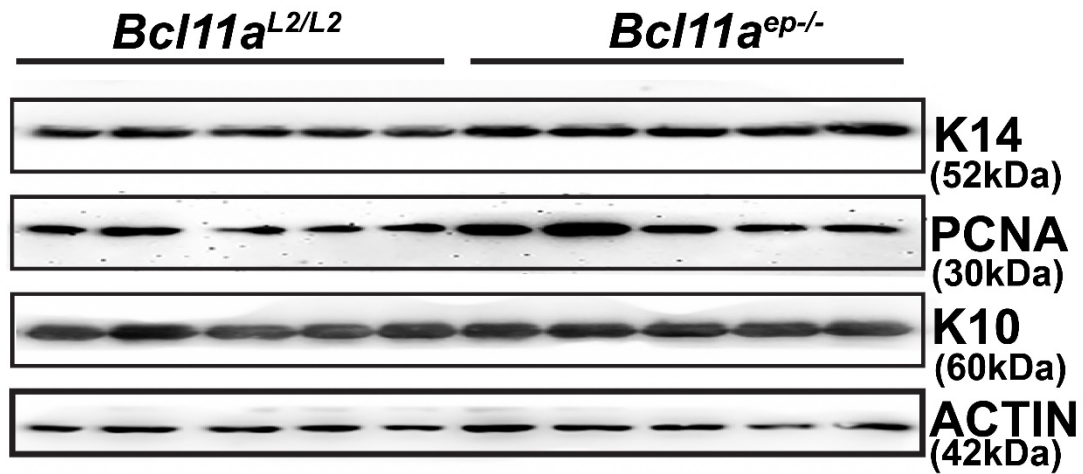

b

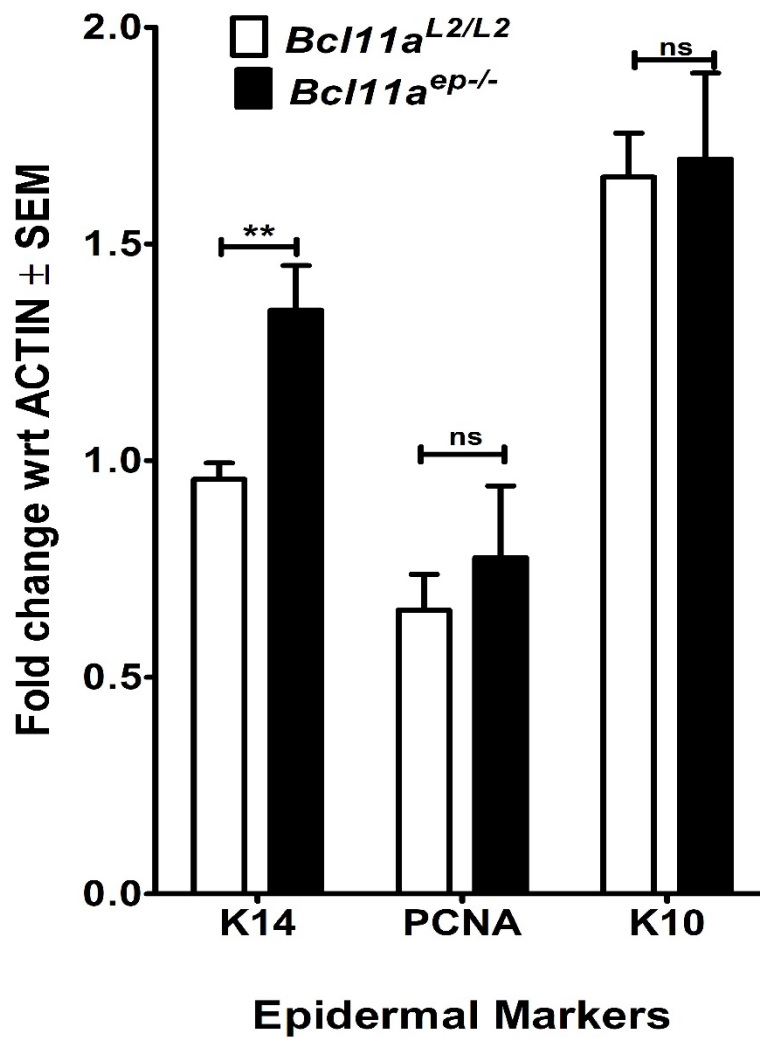

**Supplementary Figure S1:** (a) Immunoblot analyses of basal keratinocyte marker (K14), active proliferation marker (PCNA), and early differentiation marker (K10) expression in epidermal protein extracts isolated from P39 tail skin samples.  $\beta$ -actin was used as the internal control. (b) Bar graph quantification displaying the relative fold change in the expression status of epidermal markers (K14, PCNA and K10) in P39 *Bcl11a*<sup>L2/L2</sup> versus *Bcl11a*<sup>ep-/-</sup> tail epidermal extracts. N=5. N represents the number of animals of each genotype (*Bcl11a*<sup>L2/L2</sup> or *Bcl11a*<sup>ep-/-</sup>) being involved in the study. \*\*P<0.01, <sup>ns</sup><non-significant.

**P34****a**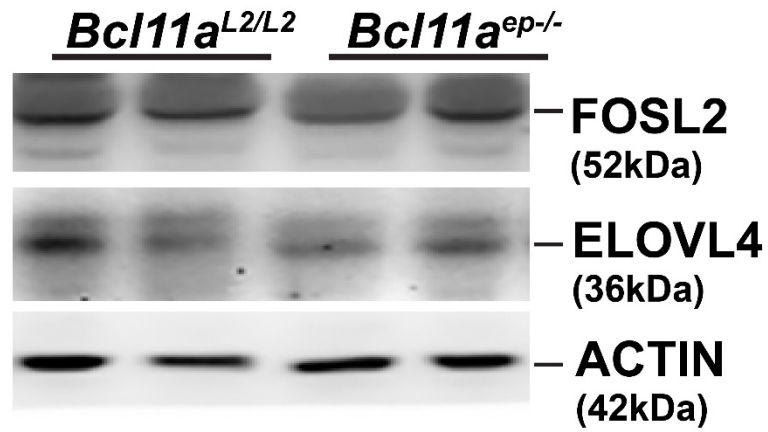**b**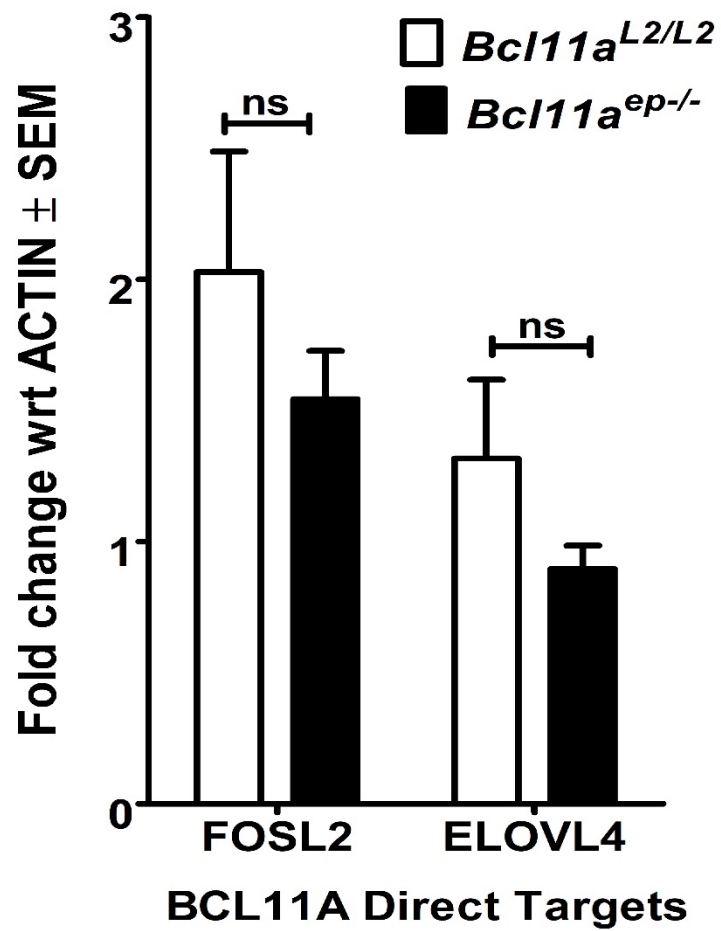

**Supplementary Figure S2:** (a) Immunoblot analyses of previously identified BCL11A targets (FOSL2 and ELOVL4) in epidermal protein extracts isolated from P34 tail skin samples.  $\beta$ -actin was used as the internal control. (b) Bar graph quantification displaying the relative fold change in the expression status in P34 *Bcl11a*<sup>L2/L2</sup> versus *Bcl11a*<sup>ep-/-</sup> tail epidermal extracts. N=4. N represents the number of animals of each genotype (*Bcl11a*<sup>L2/L2</sup> or *Bcl11a*<sup>ep-/-</sup>) being involved in the study. <sup>ns</sup><non-significant.

## SUPPLEMENTAL TABLES S1-S3

**Table S1: List of primers used for genotyping**

| Gene                                | Strand  | Sequence                   |
|-------------------------------------|---------|----------------------------|
| <i>Bcl11a</i> <sup>L2/L2</sup> (L2) | Forward | 5'-CCCAGAGTAGCAAGCTCACC-3' |
|                                     | Reverse | 5'-CACTCGATCACTGTGCCATT-3' |
| <i>Bcl11a</i> <sup>ep-/-</sup> (L-) | Forward | 5'-CCCTTGACTCTTTGGCTTGA-3' |
|                                     | Reverse | 5'-CACTCGATCACTGTGCCATT-3' |
| <i>Cre</i>                          | Forward | 5'-ATTTGCCTGCATTACCGGTC-3' |
|                                     | Reverse | 5'-ATCAACGTTTTCTTTTCGG-3'  |

**Table S2: List of antibodies used for Immunoblotting (IB)**

| Antibody                   | Type      | Working Dilution | Company                  | Catalog Number | Host   |
|----------------------------|-----------|------------------|--------------------------|----------------|--------|
| K10                        | Primary   | 1:3333           | Biologend                | 905401         | Rabbit |
| PCNA                       | Primary   | 1:2000           | Abcam                    | Ab29           | Mouse  |
| K6                         | Primary   | 1:1000           | Santa Cruz Biotechnology | Sc-56373       | Mouse  |
| ACTIN                      | Primary   | 1:2000           | Bethyl Laboratories      | A300-491A      | Rabbit |
| K14                        | Primary   | 1:15000          | Biologend                | 905301         | Rabbit |
| FOSL2                      | Primary   | 1:83             | DSHB                     | PCRP-FOSL2-1B1 | Mouse  |
| ELOVL4                     | Primary   | 1:500            | Novus Biologicals        | NBP1-68493     | Rabbit |
| Goat Anti Rabbit H&L Chain | Secondary | 1:10000          | Calbiochem               | 401315         | Goat   |
| Goat Anti Mouse H&L Chain  | Secondary | 1:10000          | Calbiochem               | 401753         | Goat   |

**Table S3: List of antibodies used for Immunohistochemistry (IHC)**

| Antibody | Type    | Working Dilution | Company   | Catalog Number | Host   |
|----------|---------|------------------|-----------|----------------|--------|
| K10      | Primary | 1:500            | Biologend | 905401         | Rabbit |
| PCNA     | Primary | 1:6000           | Abcam     | Ab29           | Mouse  |

|                                                                 |           |       |                             |             |        |
|-----------------------------------------------------------------|-----------|-------|-----------------------------|-------------|--------|
| K14                                                             | Primary   | 1:500 | Biolegend                   | 905301      | Rabbit |
| K6                                                              | Primary   | 1:200 | Santa Cruz<br>Biotechnology | Sc-56373    | Mouse  |
| CD31                                                            | Primary   | 1:50  | Abcam                       | Ab28364     | Rabbit |
| $\alpha$ -SMA                                                   | Primary   | 1:100 | Biolegend                   | 904601      | Mouse  |
| CY™ 3-Conjugated<br>AffiniPure Goat Anti<br>Mouse IgG (H+L)     | Secondary | 1:400 | Jackson<br>ImmunoResearch   | 111-225-144 | Goat   |
| CY™ 2-Conjugated<br>AffiniPure Goat Anti<br>Rabbit IgG<br>(H+L) | Secondary | 1:600 | Jackson<br>ImmunoResearch   | 115-165-003 | Goat   |
